# Supplementary material
Source: bioRxiv or medRxiv preprint supplement (https://www.biorxiv.org/highwire/filestream/11670/field_highwire_adjunct_files/7/040386-8.pdf)
Supplement: Supplementary file [file 040386-8.pdf]

**Table S1.** A spatially explicit occurrence database for Zika virus

| Country                        | Locality String                                                                                                                                                         | GeoLat         | GeoLong             | Uncert. (m) | Comments                           | Study |
|--------------------------------|-------------------------------------------------------------------------------------------------------------------------------------------------------------------------|----------------|---------------------|-------------|------------------------------------|-------|
| Angola                         | Maquela do Zombo                                                                                                                                                        | -6.050078      | 15.108851           | 4083        |                                    | [1]   |
| Angola                         | Beù                                                                                                                                                                     | -6.231823      | 15.471298           | 21525       |                                    | [1]   |
| Angola                         | Lobito                                                                                                                                                                  | -<br>12.371888 | 13.562743           | 5058        |                                    | [1]   |
| Angola                         | Mocamedes                                                                                                                                                               | -<br>15.203731 | 12.153252           | 3465        |                                    | [1]   |
| Brazil                         | Santa Helena<br>Hospital, Camacari,<br>Bahia                                                                                                                            | -<br>12.700504 | -38.332377          | NA          | Exact location of hospital         | [2]   |
| Brazil                         | Salvador                                                                                                                                                                | -<br>12.983333 | -38.516667          | 18306       | Uncertain (numerous<br>candidates) | [3]   |
| Brazil                         | Belém                                                                                                                                                                   | -1.453613      | -48.478676          | 6942        |                                    | [4]   |
| Brazil                         | Benevides, Pará                                                                                                                                                         | -1.359566      | -48.249232          | 3199        |                                    | [5]   |
| Brazil                         | Cametá                                                                                                                                                                  | -2.25          | -49.5               | 4803        |                                    | [4]   |
| Brazil                         | Natal, Rio Grande<br>do Norte                                                                                                                                           | -5.795001      | -35.208891          |             | 05°47'42"S, 35°12'32"O             | [6]   |
| Cambodia                       | Kampong Speu<br>Province                                                                                                                                                | 11.561896      | 104.34157           | 60463       |                                    | [7]   |
| Cameroon                       | Provincial Hospital<br>Annex and Mount<br>Mary Health Centre<br>in Buea &<br>Cameroon<br>Development<br>Corporation Central<br>Clinic, Tiko, Fako<br>Division, Cameroon | 4.075185       | 9.3699              | 3573        |                                    | [8]   |
| Central<br>African<br>Republic | Bozo                                                                                                                                                                    | 5.140642       | 18.478947           | 579         |                                    | [9]   |
| Chile                          | Easter Island                                                                                                                                                           | -<br>27.116667 | -<br>109.36666<br>7 | 13845       |                                    | [10]  |
| Colombia                       | Sincelejo                                                                                                                                                               | 9.304722       | -75.397778          | 3645        |                                    | [11]  |
| Egypt                          | Elwan                                                                                                                                                                   | 27.269         | 30.88               |             |                                    | [12]  |
| French<br>Polynesia            | Bora Bora                                                                                                                                                               | -16.4944       | -151.7364           | NA          |                                    | [13]  |
| French<br>Polynesia            | French Polynesia                                                                                                                                                        |                |                     |             | Too broad a region                 | [10]  |
| French<br>Polynesia            | Centre Hospitalier<br>du Taaone                                                                                                                                         | -<br>17.528796 | -<br>149.54657<br>3 | NA          |                                    | [14]  |
| French<br>Polynesia            | Tahiti                                                                                                                                                                  |                |                     |             | (Duplicate with another)           | [15]  |

|              |                                           |           |           |       |                              |      |
|--------------|-------------------------------------------|-----------|-----------|-------|------------------------------|------|
| <b>Gabon</b> | Cocobeach                                 | 1.000186  | 9.582285  | 1614  |                              | [16] |
| <b>Gabon</b> | Diba-Diba,<br>Libreville                  | 0.383333  | 9.45      | 10421 |                              | [16] |
| <b>Gabon</b> | Nzeng-Ayong,<br>Libreville                | 0.421697  | 9.478728  | 1304  |                              | [16] |
| <b>Gabon</b> | PK6, Libreville                           | 0.405025  | 9.479887  | 724   |                              | [16] |
| <b>Gabon</b> | PK8, Libreville                           | 0.410089  | 9.49259   | 687   |                              | [16] |
| <b>Gabon</b> | Alenkiri, Libreville                      | 0.304433  | 9.509842  | 2041  |                              | [16] |
| <b>India</b> | Paud, Poona,<br>Bombay                    | 18.52404  | 73.615322 | 5793  |                              | [17] |
| <b>India</b> | Khandala, Poona,<br>Bombay                | 18.059182 | 74.015993 | 5692  |                              | [17] |
| <b>India</b> | Rasalpur, East<br>Khandesh, Bombay        | 26.900684 | 75.424156 | 2809  | Corrected to: Asalpur        | [17] |
| <b>India</b> | Zagadia, Broach,<br>Bombay                | 21.714349 | 73.15101  | 3454  | Corrected to: Jhagadia       | [17] |
| <b>India</b> | Ankleswar, Broach,<br>Bombay              | 21.632356 | 72.990015 | 6147  | Corrected to: Ankleshwar     | [17] |
| <b>India</b> | Sajad, Broach,<br>Bombay                  |           |           |       |                              | [17] |
| <b>India</b> | Jambusar, Broach,<br>Bombay               | 22.052359 | 72.800741 | 2145  |                              | [17] |
| <b>India</b> | Broach, Broach,<br>Bombay                 | 21.694821 | 72.980501 | 7010  | Corrected to: Bharuch        | [17] |
| <b>India</b> | Bareja,<br>Ahmedabad,<br>Bombay           | 22.848628 | 72.591375 | 1434  |                              | [17] |
| <b>India</b> | Modhwada,<br>Porbander,<br>Saurashtra     | 21.816703 | 69.522944 | NA    | Corrected to: Modhvada       | [17] |
| <b>India</b> | Porbander,<br>Porbander,<br>Saurashtra    | 21.641346 | 69.600868 | 5418  | Corrected to: Porbandar      | [17] |
| <b>India</b> | Kutiyaana, Sorath,<br>Saurashtra          | 21.624099 | 69.984937 | 1690  | Sorath outdated              | [17] |
| <b>India</b> | Ranavav, Sorath,<br>Saurashtra            | 21.687339 | 69.74485  | 3073  | Sorath outdated              | [17] |
| <b>India</b> | Ramtek, Nagpur,<br>Madhya Pradesh         | 21.395514 | 79.327017 | 3556  | Sorath outdated              | [17] |
| <b>India</b> | Unrer, Nagpur,<br>Madhya Pradesh          |           |           |       | Could not be located         | [17] |
| <b>India</b> | Kamptee, Nagpur,<br>Madhya Pradesh        | 21.217137 | 79.194531 | 3531  |                              | [17] |
| <b>India</b> | Mehbubnagar,<br>Mehbubnagar,<br>Hyderabad | 16.567033 | 73.737634 | 3269  | Corrected to<br>Mahabubnagar | [17] |

|                      |                                          |           |            |       |                          |      |
|----------------------|------------------------------------------|-----------|------------|-------|--------------------------|------|
| <b>India</b>         | Tiruvellore, Chingleput, Madras          | 13.143745 | 79.905682  | 3613  | Corrected to: Tiruvallur | [17] |
| <b>Indonesia</b>     | Jakarta                                  | -6.2182   | 106.8584   | 23109 |                          | [18] |
| <b>Indonesia</b>     | Tegalyoso Hospital, Klaten, Central Java | -7.705833 | 110.606389 | 4681  |                          | [19] |
| <b>Indonesia</b>     | Lombok                                   | -8.554324 | 116.293132 | 58689 |                          | [20] |
| <b>Malaysia</b>      | Bentong, West Central Mal.               | 3.5316    | 101.9038   | 7068  |                          | [21] |
| <b>Micronesia</b>    | Yap Island                               | 9.533149  | 138.11617  | NA    |                          | [22] |
| <b>Micronesia</b>    | Yap Island                               |           |            |       | (Duplicate with another) | [23] |
| <b>Micronesia</b>    | Federated States of Micronesia           |           |            |       | Too broad a region       | [10] |
| <b>New Caledonia</b> | New Caledonia                            |           |            |       | Too broad a region       | [10] |
| <b>Nigeria</b>       | Kainji Lake Basin                        | 10.394167 | 4.555556   | 64023 |                          | [24] |
| <b>Nigeria</b>       | Ikeja near Lagos                         | 6.594222  | 3.337475   | 4019  |                          | [25] |
| <b>Nigeria</b>       | Oshogbo, Oyo State                       | 7.781975  | 4.549158   | 6627  |                          | [26] |
| <b>Nigeria</b>       | Igbo-Ora, Oyo State                      | 7.742222  | 3.804444   | 1785  |                          | [26] |
| <b>Nigeria</b>       | Ibadan, Oyo State                        | 7.387778  | 3.896389   | 17815 |                          | [26] |
| <b>Nigeria</b>       | Oyo, Oyo State                           | 7.840178  | 3.931335   | 12843 |                          | [26] |
| <b>Nigeria</b>       | Tagwe (Miango), Jos Plateau              | 9.85      | 8.683333   | 7840  |                          | [27] |
| <b>Nigeria</b>       | Afikpo Division                          | 5.893121  | 7.937353   | 5781  | Approximate              | [28] |
| <b>Panama</b>        | Utupo                                    | 9.137909  | -77.930758 | 1266  |                          | [29] |
| <b>Phillipines</b>   | Cebu City                                | 10.3      | 123.9      | 16394 |                          | [30] |
| <b>Phillipines</b>   | Sapangbato Field                         | 15.175368 | 120.513715 | 3036  |                          | [31] |
| <b>Phillipines</b>   | Negritos Jungle                          |           |            |       |                          | [31] |
| <b>Phillipines</b>   | Manila Urban                             | 14.5833   | 121        | 25288 |                          | [31] |
| <b>Senegal</b>       | Ke'dougou region, SE Sen.                | 12.550012 | -12.183355 | NA    | 12°33' N, 12°11' W       | [32] |
| <b>Senegal</b>       | Bandafassi, SE Sen.                      | 12.5406   | -12.3077   | 3951  |                          | [33] |
| <b>Thailand</b>      | Bangkok                                  | 13.753979 | 100.501444 | 47411 |                          | [34] |
| <b>Uganda</b>        | Zika Forest                              | 0.124167  | 32.525556  | NA    |                          | [35] |
| <b>Uganda</b>        | Madi District, Laropi, Dufile            | 3.560679  | 31.880368  | 10138 |                          | [36] |
| <b>Uganda</b>        | Mengo B, Luwero, Bukomero,               | 0.842124  | 32.492496  | 2445  |                          | [36] |

---

|                |                                      |    |     |      |                    |      |
|----------------|--------------------------------------|----|-----|------|--------------------|------|
|                | Ntenjeru<br>and Nakasongol           |    |     |      |                    |      |
| <b>Vanuata</b> | Vanuatu                              |    |     |      | Too broad a region | [37] |
| <b>Vietnam</b> | Tonkin/Tong-King,<br>Red River Delta | 22 | 105 | 2776 |                    | [34] |

---

## Literature Cited

- [1] Kokernot, R. H., Casaca, V. M. R., Weinbren, M. P. & McIntosh, B. M. Survey for antibodies against arthropod-borne viruses in the sera of indigenous residents of Angola. *T. Roy. Soc. Trop. Med. H.* **59**, 563-570 (1965).
- [2] Campos, G.S., Bandeira, A.C. & Sardi, S.I. Zika virus outbreak, Bahia, Brazil. *Emerg. Infect. Dis.* **21**, 1885 (2015).
- [3] Cardoso, C.W., *et al.* Outbreak of Exanthematous Illness Associated with Zika, Chikungunya, and Dengue Viruses, Salvador, Brazil. *Emerg. Infect. Dis.* **21**, 2274–2276 (2015).
- [4] Causey, O.R., & Theiler, M. Virus antibody survey on sera of residents of the Amazon Valley in Brazil. *Am. J. Trop. Med. Hyg.* **7**, 36-41 (1958).
- [5] Pan American Health Organization. Epidemiological Alert: Neurological syndrome, congenital malformations, and Zika virus infection. Implications for public health in the Americas. 1 December 2015.  
[http://www.paho.org/hq/index.php?option=com\\_docman&task=doc\\_download&Itemid=&gid=32405&lang=en](http://www.paho.org/hq/index.php?option=com_docman&task=doc_download&Itemid=&gid=32405&lang=en). Accessed 2/10/2016
- [6] Zanluca, C., *et al.* First report of autochthonous transmission of Zika virus in Brazil. *Mem. I. Oswaldo Cruz* **110**, 569-572 (2015).
- [7] Heang, V., *et al.* Zika virus infection, Cambodia, 2010. *Emerg. Infect. Dis.* **18**, 349 (2012).
- [8] Fokam, E. B., *et al.* Silent circulation of arboviruses in Cameroon. *E. Afr. Med. J.* **87**, 262-268 (2010).
- [9] Berthet, N., *et al.* Molecular Characterization of Three Zika Flaviviruses, Obtained from Sylvatic Mosquitoes in the Central African Republic. *Vector Borne Zoonotic Dis* **14**, 862-865 (2014).
- [10] Musso, D., Nilles, E.J. & Cao-Lormeau, V.M. Rapid spread of emerging Zika virus in the Pacific area. *Clin. Microbiol. Infec.* **20**, O595-O596 (2014).
- [11] Camacho E, Paternina-Gomez M, Blanco PJ, Osorio JE, Aliota MT. Detection of autochthonous Zika virus transmission in Sincelejo, Colombia. *Emerg Infect Dis.* 2016 May.  
<http://dx.doi.org/10.3201/eid2205.160023>
- [12] Smithburn, K. C., *et al.* Immunity to certain arthropod-borne viruses among indigenous residents of Egypt. *Am. J. Trop. Med. H.* **3**, 9-18 (1954).
- [13] Kutsuna, S., *et al.* Two cases of Zika fever imported from French Polynesia to Japan, December 2013 to January 2014. *Euro. Surveill.* **19**, 1-5 (2014).
- [14] Cao-Lormeau, V.M. *et al.* Zika Virus, French Polynesia, South Pacific, 2013. DOI:  
<http://dx.doi.org/10.3201/eid2006.140138>
- [15] Wæhre T., Maagard, A., Tappe D., Cadar D. & Schmidt-Chanasit, J. Zika Virus Infection after Travel to Tahiti, December 2013. *Emerg. Infect. Dis.* **20**, 1412-1414 (2014).

- [16] Grard, G., *et al.* Zika virus in Gabon (Central Africa)–2007: a new threat from *Aedes albopictus*. *PLoS Negl. Trop. Dis.* **8**, e2681 (2014).
- [17] Smithburn, K. C., Kerr, J.A. & Gatne, P.B. Neutralizing antibodies against certain viruses in the sera of residents of India. *J. Immunol.* **72**, 248-257 (1954).
- [18] Kwong, J.C., Druce, J.D. & Leder, K. Zika virus infection acquired during brief travel to Indonesia. *Am. J. Trop. Med. H.* **89**, 516-517 (2013).
- [19] Olson, J. G. & Ksiazek, T.G. Zika virus, a cause of fever in Central Java, Indonesia. *T. Roy. Soc. Trop. Med. H.* **75**, 389-393 (1981).
- [20] Olson, J. G., *et al.* A survey for arboviral antibodies in sera of humans and animals in Lombok, Republic of Indonesia. *Ann. Trop. Med. Parasit.* **77**, 131-137 (1983).
- [21] Marchette, N. J., Garcia, R. & Rudnick, A. Isolation of Zika virus from *Aedes aegypti* mosquitoes in Malaysia. *Am. J. Trop. Med. H.* **18**, 411-415 (1969).
- [22] Duffy, M.R., *et al.* Zika virus outbreak on Yap Island, federated states of Micronesia. *N. Eng. J. Med.* **360**, 2536-2543 (2009).
- [23] Lanciotti, R.S., *et al.* Genetic and serologic properties of Zika virus associated with an epidemic, Yap State, Micronesia, 2007. *Emerg. Infect. Dis.* **14**, 1232 (2008).
- [24] Adekolu-John, E. O. & Fagbami, A.H. Arthropod-borne virus antibodies in sera of residents of Kainji Lake Basin, Nigeria 1980. *T. Roy. Soc. Trop. Med. H.* **77**, 149-151(1983).
- [25] Boorman, J. P. T., & Porterfield, J.S. A simple technique for infection of mosquitoes with viruses transmission of Zika virus. *T. Roy. Soc. Trop. Med. H.* **50**, 238-242 (1956).
- [26] Fagbami, A. H. Zika virus infections in Nigeria: virological and seroepidemiological investigations in Oyo State. *J. Hygiene - Cambridge* **83**, 213-219 (1979).
- [27] Lee, V. H., & Moore, D.L. Vectors of the 1969 yellow fever epidemic on the Jos Plateau, Nigeria. *Bull. World Health Organ.* **46**, 669 (1972).
- [28] Macnamara, F.N. Zika virus: a report on three cases of human infection during an epidemic of jaundice in Nigeria. *T. Roy. Soc. Trop. Med. H.* **48**, 139-145 (1954).
- [29] <http://www.minsa.gob.pa/noticia/ministerio-de-salud-comunica-la-poblacion-panamena-sobre-el-virus-zika>
- [30] Alera, M.T., *et al.* Zika virus infection, Philippines, 2012. *Emerg. Infect. Dis.* **21**, 722 (2015).
- [31] Hammon, W., Schrack, W.D. & Sather, G.E. Serological Survey for Arthropod-Borne Virus Infections in the Philippines. *Am. J. Trop. Med. Hyg.* **7**, 323-328 (1958).
- [32] Diallo, D., *et al.* Zika virus emergence in mosquitoes in southeastern Senegal, 2011. *PloS one* **9**, e109442 (2014).

- [33] Foy, B.D., *et al.* Probable non–vector-borne transmission of Zika virus, Colorado, USA. *Emerg. Infect. Dis.* **17**, 880 (2011).
- [34] Pond, W.L. Arthropod-borne virus antibodies in sera from residents of South-East Asia. *T. Roy. Soc. Trop. Med. H.* **57**, 364-371 (1963).
- [35] Dick, G. W. A., Kitchen, S.F. & Haddock, A.J.. Zika virus (I). Isolations and serological specificity. *T. Roy. Soc. Trop. Med. H.* **46**, 509-520 (1952).
- [36] Henderson, B. E., Kirya, G.B. & Hewitt, L.E. Serological survey for arboviruses in Uganda, 1967-69. *Bull. World Health Organ.* **42**, 797 (1970).
- [37] Musso, D., Cao-Lormeau, V.M. & Gubler, D.J.. Zika virus: following the path of dengue and chikungunya? *Lancet* **386**, 243-244 (2015).
